# Supplementary material
Source: Springer Nature journal article supplement (https://www.springermedizin.de/resource/supplementary/12891_2009_795_MOESM2_ESM.pdf/9507032)

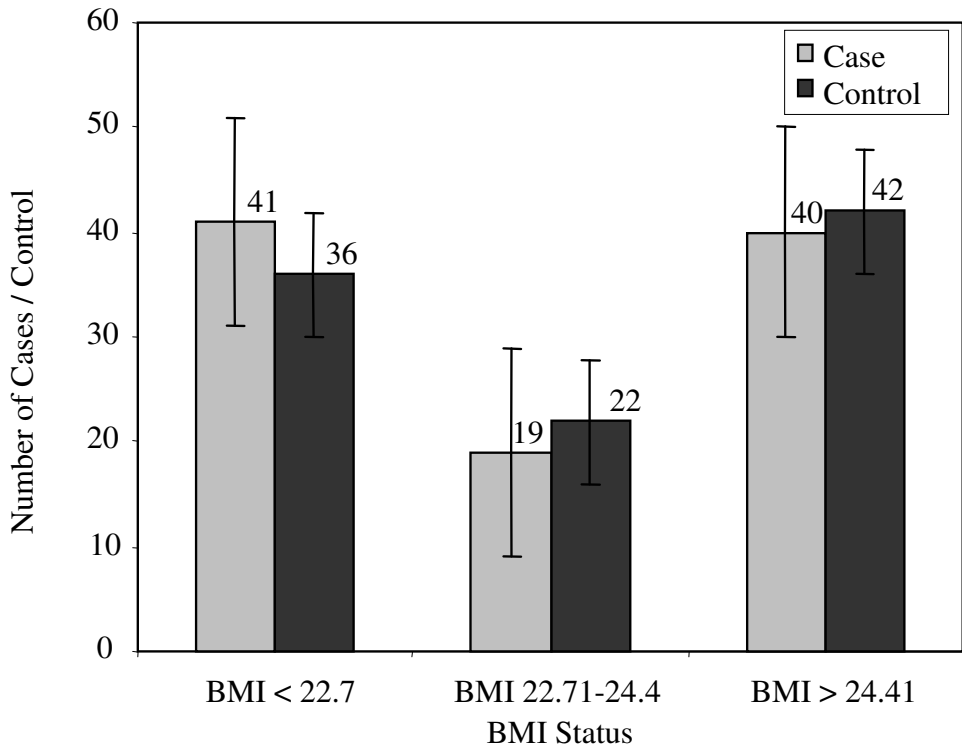

Supplement: MOESM2 [file 9507032]
